# Supplementary material for: A complex DICER1 syndrome phenotype associated with a germline pathogenic variant affecting the RNase IIIa domain of DICER1
Source: PubMed Central journal article supplement (PMC8788248; doi:10.1136/jmedgenet-2020-107385), 2020-11-18
Supplement: jmedgenet-2020-107385supp001.pdf [file jmedgenet-2020-107385supp001.pdf]

**Supplementary Table 1; List of analyzed genes**

| HGNC symbol | HGNC ID | Description                                       |
|-------------|---------|---------------------------------------------------|
| ABCA12      | 14637   | ATP binding cassette subfamily A member 12        |
| ABCC9       | 60      | ATP binding cassette subfamily C member 9         |
| ACAN        | 319     | aggrecan                                          |
| ACOX1       | 119     | acyl-CoA oxidase 1                                |
| ADK         | 257     | adenosine kinase                                  |
| AGGF1       | 24684   | angiogenic factor with G-patch and FHA domains 1  |
| AHI1        | 21575   | Abelson helper integration site 1                 |
| AKT1        | 391     | AKT serine/threonine kinase 1                     |
| AKT3        | 393     | AKT serine/threonine kinase 3                     |
| ALX3        | 449     | ALX homeobox 3                                    |
| ALX4        | 450     | ALX homeobox 4                                    |
| AMER1       | 26837   | APC membrane recruitment protein 1                |
| ANKH        | 15492   | ANKH inorganic pyrophosphate transport regulator  |
| ANTXR2      | 21732   | ANTXR cell adhesion molecule 2                    |
| AP1S2       | 560     | adaptor related protein complex 1 subunit sigma 2 |
| APC2        | 24036   | APC2 WNT signaling pathway regulator              |
| ARL13B      | 25419   | ADP ribosylation factor like GTPase 13B           |
| ARL6        | 13210   | ADP ribosylation factor like GTPase 6             |
| ARMC9       | 20730   | armadillo repeat containing 9                     |
| ARSB        | 714     | arylsulfatase B                                   |
| ARVCF       | 728     | ARVCF delta catenin family member                 |
| ASPA        | 756     | aspartoacylase                                    |
| ASXL2       | 23805   | ASXL transcriptional regulator 2                  |
| B3GALNT2    | 28596   | beta-1 3-N-acetylgalactosaminyltransferase 2      |
| B3GALT6     | 17978   | beta-1 3-galactosyltransferase 6                  |
| B3GLCT      | 20207   | beta 3-glucosyltransferase                        |
| B4GALT1     | 924     | beta-1 4-galactosyltransferase 1                  |
| B4GALT7     | 930     | beta-1 4-galactosyltransferase 7                  |
| B4GAT1      | 15685   | beta-1 4-glucuronyltransferase 1                  |
| B9D1        | 24123   | B9 domain containing 1                            |
| B9D2        | 28636   | B9 domain containing 2                            |
| BBIP1       | 28093   | BBSome interacting protein 1                      |
| BBS1        | 966     | Bardet-Biedl syndrome 1                           |
| BBS10       | 26291   | Bardet-Biedl syndrome 10                          |
| BBS12       | 26648   | Bardet-Biedl syndrome 12                          |
| BBS2        | 967     | Bardet-Biedl syndrome 2                           |
| BBS4        | 969     | Bardet-Biedl syndrome 4                           |
| BBS5        | 970     | Bardet-Biedl syndrome 5                           |
| BBS7        | 18758   | Bardet-Biedl syndrome 7                           |
| BBS9        | 30000   | Bardet-Biedl syndrome 9                           |
| BGN         | 1044    | biglycan                                          |
| BHLHA9      | 35126   | basic helix-loop-helix family member a9           |
| BLM         | 1058    | BLM RecQ like helicase                            |
| BMP2        | 1069    | bone morphogenetic protein 2                      |
| BMP4        | 1071    | bone morphogenetic protein 4                      |
| BMPRI1B     | 1077    | bone morphogenetic protein receptor type 1B       |
| BRAF        | 1097    | B-Raf proto-oncogene serine/threonine kinase      |
| BRCA2       | 1101    | BRCA2 DNA repair associated                       |

|          |       |                                                   |
|----------|-------|---------------------------------------------------|
| BRWD3    | 17342 | bromodomain and WD repeat domain containing 3     |
| BUB1     | 1148  | BUB1 mitotic checkpoint serine/threonine kinase   |
| BUB1B    | 1149  | BUB1 mitotic checkpoint serine/threonine kinase B |
| BUB3     | 1151  | BUB3 mitotic checkpoint protein                   |
| C12orf57 | 29521 | chromosome 12 open reading frame 57               |
| C2CD3    | 24564 | C2 calcium dependent domain containing 3          |
| C8orf37  | 27232 | chromosome 8 open reading frame 37                |
| CAMTA1   | 18806 | calmodulin binding transcription activator 1      |
| CC2D2A   | 29253 | coiled-coil and C2 domain containing 2A           |
| CCDC22   | 28909 | coiled-coil domain containing 22                  |
| CCND2    | 1583  | cyclin D2                                         |
| CD96     | 16892 | CD96 molecule                                     |
| CDC45    | 1739  | cell division cycle 45                            |
| CDC73    | 16783 | cell division cycle 73                            |
| CDCA7    | 14628 | cell division cycle associated 7                  |
| CDKN1C   | 1786  | cyclin dependent kinase inhibitor 1C              |
| CEP104   | 24866 | centrosomal protein 104                           |
| CEP120   | 26690 | centrosomal protein 120                           |
| CEP164   | 29182 | centrosomal protein 164                           |
| CEP290   | 29021 | centrosomal protein 290                           |
| CEP41    | 12370 | centrosomal protein 41                            |
| CEP55    | 1161  | centrosomal protein 55                            |
| CEP57    | 30794 | centrosomal protein 57                            |
| CFC1     | 18292 | cripto FRL-1 cryptic family 1                     |
| CHD4     | 1919  | chromodomain helicase DNA binding protein 4       |
| CHD7     | 20626 | chromodomain helicase DNA binding protein 7       |
| CHN1     | 1943  | chimerin 1                                        |
| CHRNA7   | 1960  | cholinergic receptor nicotinic alpha 7 subunit    |
| CLCN7    | 2025  | chloride voltage-gated channel 7                  |
| COG6     | 18621 | component of oligomeric golgi complex 6           |
| COL25A1  | 18603 | collagen type XXV alpha 1 chain                   |
| COL2A1   | 2200  | collagen type II alpha 1 chain                    |
| COL4A1   | 2202  | collagen type IV alpha 1 chain                    |
| COLEC10  | 2220  | collectin subfamily member 10                     |
| COMT     | 2228  | catechol-O-methyltransferase                      |
| CPLX1    | 2309  | complexin 1                                       |
| CRB2     | 18688 | crumbs cell polarity complex component 2          |
| CREBBP   | 2348  | CREB binding protein                              |
| CSPP1    | 26193 | centrosome and spindle pole associated protein 1  |
| CTBP1    | 2494  | C-terminal binding protein 1                      |
| CUL4B    | 2555  | cullin 4B                                         |
| CWC27    | 10664 | CWC27 spliceosome associated protein homolog      |
| D2HGDH   | 28358 | D-2-hydroxyglutarate dehydrogenase                |
| DACT1    | 17748 | dishevelled binding antagonist of beta catenin 1  |
| DAG1     | 2666  | dystroglycan 1                                    |
| DDX59    | 25360 | DEAD-box helicase 59                              |
| DEAF1    | 14677 | DEAF1 transcription factor                        |
| DHCR24   | 2859  | 24-dehydrocholesterol reductase                   |
| DHCR7    | 2860  | 7-dehydrocholesterol reductase                    |
| DICER1   | 17098 | dicer 1 ribonuclease III                          |
| DIS3L2   | 28648 | DIS3 like 3'-5' exoribonuclease 2                 |

|          |       |                                                             |
|----------|-------|-------------------------------------------------------------|
| DLL3     | 2909  | delta like canonical Notch ligand 3                         |
| DMRT3    | 13909 | doublesex and mab-3 related transcription factor 3          |
| DNMT3A   | 2978  | DNA methyltransferase 3 alpha                               |
| DNMT3B   | 2979  | DNA methyltransferase 3 beta                                |
| DOCK6    | 19189 | dedicator of cytokinesis 6                                  |
| DPYD     | 3012  | dihydropyrimidine dehydrogenase                             |
| DVL1     | 3084  | dishevelled segment polarity protein 1                      |
| DVL3     | 3087  | dishevelled segment polarity protein 3                      |
| DYNC2H1  | 2962  | dynein cytoplasmic 2 heavy chain 1                          |
| DYNC2LI1 | 24595 | dynein cytoplasmic 2 light intermediate chain 1             |
| EBP      | 3133  | EBP cholesterol delta-isomerase                             |
| EED      | 3188  | embryonic ectoderm development                              |
| EFNB1    | 3226  | ephrin B1                                                   |
| EFTUD2   | 30858 | elongation factor Tu GTP binding domain containing 2        |
| EIF2B1   | 3257  | eukaryotic translation initiation factor 2B subunit alpha   |
| EIF2B2   | 3258  | eukaryotic translation initiation factor 2B subunit beta    |
| EIF2B3   | 3259  | eukaryotic translation initiation factor 2B subunit gamma   |
| EIF2B4   | 3260  | eukaryotic translation initiation factor 2B subunit delta   |
| EIF2B5   | 3261  | eukaryotic translation initiation factor 2B subunit epsilon |
| EML1     | 3330  | EMAP like 1                                                 |
| EP300    | 3373  | E1A binding protein p300                                    |
| ERF      | 3444  | ETS2 repressor factor                                       |
| ERMARD   | 21056 | ER membrane associated RNA degradation                      |
| ETFA     | 3481  | electron transfer flavoprotein subunit alpha                |
| ETFB     | 3482  | electron transfer flavoprotein subunit beta                 |
| ETFDH    | 3483  | electron transfer flavoprotein dehydrogenase                |
| EVC      | 3497  | EvC ciliary complex subunit 1                               |
| EVC2     | 19747 | EvC ciliary complex subunit 2                               |
| EXT2     | 3513  | exostosin glycosyltransferase 2                             |
| EZH2     | 3527  | enhancer of zeste 2 polycomb repressive complex 2 subunit   |
| FAM111A  | 24725 | family with sequence similarity 111 member A                |
| FANCB    | 3583  | FA complementation group B                                  |
| FBLN1    | 3600  | fibulin 1                                                   |
| FBN1     | 3603  | fibrillin 1                                                 |
| FGF10    | 3666  | fibroblast growth factor 10                                 |
| FGFR1    | 3688  | fibroblast growth factor receptor 1                         |
| FGFR2    | 3689  | fibroblast growth factor receptor 2                         |
| FGFR3    | 3690  | fibroblast growth factor receptor 3                         |
| FGFRL1   | 3693  | fibroblast growth factor receptor like 1                    |
| FH       | 3700  | fumarate hydratase                                          |
| FIBP     | 3705  | FGF1 intracellular binding protein                          |
| FKRP     | 17997 | fukutin related protein                                     |
| FKTN     | 3622  | fukutin                                                     |
| FLI1     | 3749  | Fli-1 proto-oncogene ETS transcription factor               |
| FLII     | 3750  | FLII actin remodeling protein                               |
| FLNA     | 3754  | filamin A                                                   |
| FMR1     | 3775  | fragile X mental retardation 1                              |
| FOXP1    | 3823  | forkhead box P1                                             |
| FOXRED1  | 26927 | FAD dependent oxidoreductase domain containing 1            |
| FZD2     | 4040  | frizzled class receptor 2                                   |
| GABRD    | 4084  | gamma-aminobutyric acid type A receptor delta subunit       |

|          |       |                                                                            |
|----------|-------|----------------------------------------------------------------------------|
| GATA4    | 4173  | GATA binding protein 4                                                     |
| GATA6    | 4174  | GATA binding protein 6                                                     |
| GCDH     | 4189  | glutaryl-CoA dehydrogenase                                                 |
| GDF1     | 4214  | growth differentiation factor 1                                            |
| GDF5     | 4220  | growth differentiation factor 5                                            |
| GDF6     | 4221  | growth differentiation factor 6                                            |
| GFAP     | 4235  | glial fibrillary acidic protein                                            |
| GJA1     | 4274  | gap junction protein alpha 1                                               |
| GJB6     | 4288  | gap junction protein beta 6                                                |
| GLI1     | 4317  | GLI family zinc finger 1                                                   |
| GLI2     | 4318  | GLI family zinc finger 2                                                   |
| GLI3     | 4319  | GLI family zinc finger 3                                                   |
| GNAI3    | 4387  | G protein subunit alpha i3                                                 |
| GNAQ     | 4390  | G protein subunit alpha q                                                  |
| GNAS     | 4392  | GNAS complex locus                                                         |
| GP1BB    | 4440  | glycoprotein Ib platelet subunit beta                                      |
| GPC3     | 4451  | glypican 3                                                                 |
| GPC4     | 4452  | glypican 4                                                                 |
| GRIA3    | 4573  | glutamate ionotropic receptor AMPA type subunit 3                          |
| GUSB     | 4696  | glucuronidase beta                                                         |
| H19      | 4713  | H19 imprinted maternally expressed transcript                              |
| HDAC4    | 14063 | histone deacetylase 4                                                      |
| HDAC6    | 14064 | histone deacetylase 6                                                      |
| HELLS    | 4861  | helicase lymphoid specific                                                 |
| HEPACAM  | 26361 | hepatic and glial cell adhesion molecule                                   |
| HERC1    | 4867  | HECT and RLD domain containing E3 ubiquitin protein ligase family member 1 |
| HES7     | 15977 | hes family bHLH transcription factor 7                                     |
| HESX1    | 4877  | HESX homeobox 1                                                            |
| HEXB     | 4879  | hexosaminidase subunit beta                                                |
| HIRA     | 4916  | histone cell cycle regulator                                               |
| HIST1H1E | 4718  | histone cluster 1 H1 family member e                                       |
| HNRNPK   | 5044  | heterogeneous nuclear ribonucleoprotein K                                  |
| HOXA13   | 5102  | homeobox A13                                                               |
| HOXD13   | 5136  | homeobox D13                                                               |
| HRAS     | 5173  | HRas proto-oncogene GTPase                                                 |
| HSD17B4  | 5213  | hydroxysteroid 17-beta dehydrogenase 4                                     |
| HUWE1    | 30892 | HECT UBA and WWE domain containing 1 E3 ubiquitin protein ligase           |
| HYLS1    | 26558 | HYLS1 centriolar and ciliogenesis associated                               |
| ICK      | 21219 | intestinal cell kinase                                                     |
| IDS      | 5389  | iduronate 2-sulfatase                                                      |
| IDUA     | 5391  | iduronidase alpha-L-                                                       |
| IFT140   | 29077 | intraflagellar transport 140                                               |
| IFT172   | 30391 | intraflagellar transport 172                                               |
| IFT27    | 18626 | intraflagellar transport 27                                                |
| IFT43    | 29669 | intraflagellar transport 43                                                |
| IFT52    | 15901 | intraflagellar transport 52                                                |
| IFT74    | 21424 | intraflagellar transport 74                                                |
| IFT80    | 29262 | intraflagellar transport 80                                                |
| IFT81    | 14313 | intraflagellar transport 81                                                |
| IGBP1    | 5461  | immunoglobulin binding protein 1                                           |
| IGF2     | 5466  | insulin like growth factor 2                                               |

|          |       |                                                                             |
|----------|-------|-----------------------------------------------------------------------------|
| IHH      | 5956  | Indian hedgehog signaling molecule                                          |
| INPP5E   | 21474 | inositol polyphosphate-5-phosphatase E                                      |
| INPPL1   | 6080  | inositol polyphosphate phosphatase like 1                                   |
| INTU     | 29239 | inturned planar cell polarity protein                                       |
| IQSEC2   | 29059 | IQ motif and Sec7 domain 2                                                  |
| ISPD     | 37276 | isoprenoid synthase domain containing                                       |
| ITCH     | 13890 | itchy E3 ubiquitin protein ligase                                           |
| JMJD1C   | 12313 | jumonji domain containing 1C                                                |
| KCNAB2   | 6229  | potassium voltage-gated channel subfamily A regulatory beta subunit 2       |
| KCNJ1    | 6255  | potassium voltage-gated channel subfamily J member 1                        |
| KCNJ8    | 6269  | potassium voltage-gated channel subfamily J member 8                        |
| KCNQ1    | 6294  | potassium voltage-gated channel subfamily Q member 1                        |
| KCNQ1OT1 | 6295  | KCNQ1 opposite strand/antisense transcript 1                                |
| KDM1A    | 29079 | lysine demethylase 1A                                                       |
| KDM5C    | 11114 | lysine demethylase 5C                                                       |
| KIAA0556 | 29068 | KIAA0556                                                                    |
| KIAA0586 | 19960 | KIAA0586                                                                    |
| KIAA0753 | 29110 | KIAA0753                                                                    |
| KIF22    | 6391  | kinesin family member 22                                                    |
| KIF7     | 30497 | kinesin family member 7                                                     |
| KLLN     | 37212 | killin p53 regulated DNA replication inhibitor                              |
| KPTN     | 6404  | kaptin actin binding protein                                                |
| KRAS     | 6407  | KRAS proto-oncogene GTPase                                                  |
| L1CAM    | 6470  | L1 cell adhesion molecule                                                   |
| L2HGDH   | 20499 | L-2-hydroxyglutarate dehydrogenase                                          |
| LAMB1    | 6486  | laminin subunit beta 1                                                      |
| LARGE1   | 6511  | LARGE xylosyl- and glucuronyltransferase 1                                  |
| LBR      | 6518  | lamin B receptor                                                            |
| LETM1    | 6556  | leucine zipper and EF-hand containing transmembrane protein 1               |
| LFNG     | 6560  | LFNG O-fucosylpeptide 3-beta-N-acetylglucosaminyltransferase                |
| LHX4     | 21734 | LIM homeobox 4                                                              |
| LMBR1    | 13243 | limb development membrane protein 1                                         |
| LRP2     | 6694  | LDL receptor related protein 2                                              |
| LRP4     | 6696  | LDL receptor related protein 4                                              |
| LRP5     | 6697  | LDL receptor related protein 5                                              |
| LZTFL1   | 6741  | leucine zipper transcription factor like 1                                  |
| MAB21L2  | 6758  | mab-21 like 2                                                               |
| MAFB     | 6408  | MAF bZIP transcription factor B                                             |
| MAN2B1   | 6826  | mannosidase alpha class 2B member 1                                         |
| MAP2K1   | 6840  | mitogen-activated protein kinase kinase 1                                   |
| MAP2K2   | 6842  | mitogen-activated protein kinase kinase 2                                   |
| MAP3K1   | 6848  | mitogen-activated protein kinase kinase kinase 1                            |
| MAPK10   | 6872  | mitogen-activated protein kinase 10                                         |
| MBTPS2   | 15455 | membrane bound transcription factor peptidase site 2                        |
| MECP2    | 6990  | methyl-CpG binding protein 2                                                |
| MED12    | 11957 | mediator complex subunit 12                                                 |
| MEGF8    | 3233  | multiple EGF like domains 8                                                 |
| MESP2    | 29659 | mesoderm posterior bHLH transcription factor 2                              |
| MGAT2    | 7045  | mannosyl (alpha-1 6-)-glycoprotein beta-1 2-N-acetylglucosaminyltransferase |
| MITF     | 7105  | melanocyte inducing transcription factor                                    |
| MKKS     | 7108  | McKusick-Kaufman syndrome                                                   |

|         |       |                                                              |
|---------|-------|--------------------------------------------------------------|
| MKS1    | 7121  | Meckel syndrome type 1                                       |
| MLC1    | 17082 | megalencephalic leukoencephalopathy with subcortical cysts 1 |
| MOCS1   | 7190  | molybdenum cofactor synthesis 1                              |
| MOCS2   | 7193  | molybdenum cofactor synthesis 2                              |
| MPDZ    | 7208  | multiple PDZ domain crumbs cell polarity complex component   |
| MSX2    | 7392  | msh homeobox 2                                               |
| MTM1    | 7448  | myotubularin 1                                               |
| MTOR    | 3942  | mechanistic target of rapamycin kinase                       |
| MYH8    | 7578  | myosin heavy chain 8                                         |
| NDUFA1  | 7683  | NADH:ubiquinone oxidoreductase subunit A1                    |
| NDUFA11 | 20371 | NADH:ubiquinone oxidoreductase subunit A11                   |
| NDUFAF1 | 18828 | NADH:ubiquinone oxidoreductase complex assembly factor 1     |
| NDUFAF2 | 28086 | NADH:ubiquinone oxidoreductase complex assembly factor 2     |
| NDUFAF3 | 29918 | NADH:ubiquinone oxidoreductase complex assembly factor 3     |
| NDUFAF4 | 21034 | NADH:ubiquinone oxidoreductase complex assembly factor 4     |
| NDUFAF5 | 15899 | NADH:ubiquinone oxidoreductase complex assembly factor 5     |
| NDUFB3  | 7698  | NADH:ubiquinone oxidoreductase subunit B3                    |
| NDUFB9  | 7704  | NADH:ubiquinone oxidoreductase subunit B9                    |
| NDUFS1  | 7707  | NADH:ubiquinone oxidoreductase core subunit S1               |
| NDUFS2  | 7708  | NADH:ubiquinone oxidoreductase core subunit S2               |
| NDUFS3  | 7710  | NADH:ubiquinone oxidoreductase core subunit S3               |
| NDUFS4  | 7711  | NADH:ubiquinone oxidoreductase subunit S4                    |
| NDUFS6  | 7713  | NADH:ubiquinone oxidoreductase subunit S6                    |
| NDUFV1  | 7716  | NADH:ubiquinone oxidoreductase core subunit V1               |
| NDUFV2  | 7717  | NADH:ubiquinone oxidoreductase core subunit V2               |
| NEK1    | 7744  | NIMA related kinase 1                                        |
| NEK9    | 18591 | NIMA related kinase 9                                        |
| NELFA   | 12768 | negative elongation factor complex member A                  |
| NF1     | 7765  | neurofibromin 1                                              |
| NFIA    | 7784  | nuclear factor I A                                           |
| NFIX    | 7788  | nuclear factor I X                                           |
| NKX2-5  | 2488  | NK2 homeobox 5                                               |
| NKX2-6  | 32940 | NK2 homeobox 6                                               |
| NKX3-2  | 951   | NK3 homeobox 2                                               |
| NLRC4   | 16412 | NLR family CARD domain containing 4                          |
| NLRP3   | 16400 | NLR family pyrin domain containing 3                         |
| NOTCH2  | 7882  | notch 2                                                      |
| NPHP1   | 7905  | nephrocystin 1                                               |
| NPHP3   | 7907  | nephrocystin 3                                               |
| NR0B1   | 7960  | nuclear receptor subfamily 0 group B member 1                |
| NR5A1   | 7983  | nuclear receptor subfamily 5 group A member 1                |
| NRAS    | 7989  | NRAS proto-oncogene GTPase                                   |
| NSD1    | 14234 | nuclear receptor binding SET domain protein 1                |
| NSD2    | 12766 | nuclear receptor binding SET domain protein 2                |
| NUBPL   | 20278 | nucleotide binding protein like                              |
| NXN     | 18008 | nucleoredoxin                                                |
| OFD1    | 2567  | OFD1 centriole and centriolar satellite protein              |
| OPHN1   | 8148  | oligophrenin 1                                               |
| OTX2    | 8522  | orthodenticle homeobox 2                                     |
| PALB2   | 26144 | partner and localizer of BRCA2                               |
| PAX6    | 8620  | paired box 6                                                 |

|         |       |                                                                        |
|---------|-------|------------------------------------------------------------------------|
| PDE6D   | 8788  | phosphodiesterase 6D                                                   |
| PDSS1   | 17759 | decaprenyl diphosphate synthase subunit 1                              |
| PEX1    | 8850  | peroxisomal biogenesis factor 1                                        |
| PEX10   | 8851  | peroxisomal biogenesis factor 10                                       |
| PEX11B  | 8853  | peroxisomal biogenesis factor 11 beta                                  |
| PEX12   | 8854  | peroxisomal biogenesis factor 12                                       |
| PEX13   | 8855  | peroxisomal biogenesis factor 13                                       |
| PEX14   | 8856  | peroxisomal biogenesis factor 14                                       |
| PEX16   | 8857  | peroxisomal biogenesis factor 16                                       |
| PEX19   | 9713  | peroxisomal biogenesis factor 19                                       |
| PEX2    | 9717  | peroxisomal biogenesis factor 2                                        |
| PEX26   | 22965 | peroxisomal biogenesis factor 26                                       |
| PEX3    | 8858  | peroxisomal biogenesis factor 3                                        |
| PEX5    | 9719  | peroxisomal biogenesis factor 5                                        |
| PEX6    | 8859  | peroxisomal biogenesis factor 6                                        |
| PHF21A  | 24156 | PHD finger protein 21A                                                 |
| PHF6    | 18145 | PHD finger protein 6                                                   |
| PHF8    | 20672 | PHD finger protein 8                                                   |
| PIBF1   | 23352 | progesterone immunomodulatory binding factor 1                         |
| PIGA    | 8957  | phosphatidylinositol glycan anchor biosynthesis class A                |
| PIGN    | 8967  | phosphatidylinositol glycan anchor biosynthesis class N                |
| PIGT    | 14938 | phosphatidylinositol glycan anchor biosynthesis class T                |
| PIK3CA  | 8975  | phosphatidylinositol-4 5-bisphosphate 3-kinase catalytic subunit alpha |
| PIK3R2  | 8980  | phosphoinositide-3-kinase regulatory subunit 2                         |
| PITX1   | 9004  | paired like homeodomain 1                                              |
| PLCB4   | 9059  | phospholipase C beta 4                                                 |
| PLG     | 9071  | plasminogen                                                            |
| PNPLA6  | 16268 | patatin like phospholipase domain containing 6                         |
| POC1A   | 24488 | POC1 centriolar protein A                                              |
| POLE    | 9177  | DNA polymerase epsilon catalytic subunit                               |
| POMGNT1 | 19139 | protein O-linked mannose N-acetylglucosaminyltransferase 1 (beta 1 2-) |
| POMGNT2 | 25902 | protein O-linked mannose N-acetylglucosaminyltransferase 2 (beta 1 4-) |
| POMK    | 26267 | protein-O-mannose kinase                                               |
| POMT1   | 9202  | protein O-mannosyltransferase 1                                        |
| POMT2   | 19743 | protein O-mannosyltransferase 2                                        |
| POP1    | 30129 | POP1 homolog ribonuclease P/MRP subunit                                |
| PORCN   | 17652 | porcupine O-acyltransferase                                            |
| POU1F1  | 9210  | POU class 1 homeobox 1                                                 |
| POU6F2  | 21694 | POU class 6 homeobox 2                                                 |
| PPP2R5D | 9312  | protein phosphatase 2 regulatory subunit B' delta                      |
| PRDM16  | 14000 | PR/SET domain 16                                                       |
| PROP1   | 9455  | PROP paired-like homeobox 1                                            |
| PTCH1   | 9585  | patched 1                                                              |
| PTCH2   | 9586  | patched 2                                                              |
| PTDSS1  | 9587  | phosphatidylserine synthase 1                                          |
| PTEN    | 9588  | phosphatase and tensin homolog                                         |
| PTH1H   | 9607  | parathyroid hormone like hormone                                       |
| RAB23   | 14263 | RAB23 member RAS oncogene family                                       |
| RAB39B  | 16499 | RAB39B member RAS oncogene family                                      |
| RAC1    | 9801  | Rac family small GTPase 1                                              |
| RAI1    | 9834  | retinoic acid induced 1                                                |

|          |       |                                                                                               |
|----------|-------|-----------------------------------------------------------------------------------------------|
| RBM10    | 9896  | RNA binding motif protein 10                                                                  |
| RERE     | 9965  | arginine-glutamic acid dipeptide repeats                                                      |
| REST     | 9966  | RE1 silencing transcription factor                                                            |
| RIPPLY2  | 21390 | rippy transcriptional repressor 2                                                             |
| RIT1     | 10023 | Ras like without CAAX 1                                                                       |
| RNF125   | 21150 | ring finger protein 125                                                                       |
| RNF135   | 21158 | ring finger protein 135                                                                       |
| ROR2     | 10257 | receptor tyrosine kinase like orphan receptor 2                                               |
| RPGRIP1  | 13436 | RPGR interacting protein 1                                                                    |
| RPGRIP1L | 29168 | RPGRIP1 like                                                                                  |
| RREB1    | 10449 | ras responsive element binding protein 1                                                      |
| RUNX2    | 10472 | runt related transcription factor 2                                                           |
| SALL1    | 10524 | spalt like transcription factor 1                                                             |
| SALL4    | 15924 | spalt like transcription factor 4                                                             |
| SC5D     | 10547 | sterol-C5-desaturase                                                                          |
| SDCCAG8  | 10671 | serologically defined colon cancer antigen 8                                                  |
| SDHB     | 10681 | succinate dehydrogenase complex iron sulfur subunit B                                         |
| SDHC     | 10682 | succinate dehydrogenase complex subunit C                                                     |
| SDHD     | 10683 | succinate dehydrogenase complex subunit D                                                     |
| SEC23A   | 10701 | Sec23 homolog A coat complex II component                                                     |
| SEC23B   | 10702 | Sec23 homolog B coat complex II component                                                     |
| SEC24C   | 10705 | SEC24 homolog C COPII coat complex component                                                  |
| SEC24D   | 10706 | SEC24 homolog D COPII coat complex component                                                  |
| SEMA3E   | 10727 | semaphorin 3E                                                                                 |
| SERPINH1 | 1546  | serpin family H member 1                                                                      |
| SETBP1   | 15573 | SET binding protein 1                                                                         |
| SETD2    | 18420 | SET domain containing 2                                                                       |
| SH2B1    | 30417 | SH2B adaptor protein 1                                                                        |
| SHANK3   | 14294 | SH3 and multiple ankyrin repeat domains 3                                                     |
| SHH      | 10848 | sonic hedgehog signaling molecule                                                             |
| SHOC2    | 15454 | SHOC2 leucine rich repeat scaffold protein                                                    |
| SHPK     | 1492  | sedoheptulokinase                                                                             |
| SIM1     | 10882 | SIM bHLH transcription factor 1                                                               |
| SKI      | 10896 | SKI proto-oncogene                                                                            |
| SLC25A1  | 10979 | solute carrier family 25 member 1                                                             |
| SLC26A2  | 10994 | solute carrier family 26 member 2                                                             |
| SLC29A3  | 23096 | solute carrier family 29 member 3                                                             |
| SLC2A10  | 13444 | solute carrier family 2 member 10                                                             |
| SLC35D1  | 20800 | solute carrier family 35 member D1                                                            |
| SMARCB1  | 11103 | SWI/SNF related matrix associated actin dependent regulator of chromatin subfamily b member 1 |
| SMO      | 11119 | smoothened frizzled class receptor                                                            |
| SMOC1    | 20318 | SPARC related modular calcium binding 1                                                       |
| SNX10    | 14974 | sorting nexin 10                                                                              |
| SNX14    | 14977 | sorting nexin 14                                                                              |
| SOS1     | 11187 | SOS Ras/Rac guanine nucleotide exchange factor 1                                              |
| SOST     | 13771 | sclerostin                                                                                    |
| SOX9     | 11204 | SRY-box 9                                                                                     |
| SPINT2   | 11247 | serine peptidase inhibitor Kunitz type 2                                                      |
| SPRED1   | 20249 | sprouty related EVH1 domain containing 1                                                      |
| SRY      | 11311 | sex determining region Y                                                                      |
| STRADA   | 30172 | STE20 related adaptor alpha                                                                   |



|           |       |                                                                            |
|-----------|-------|----------------------------------------------------------------------------|
| SUFU      | 16466 | SUFU negative regulator of hedgehog signaling                              |
| SUMF1     | 20376 | sulfatase modifying factor 1                                               |
| SUZ12     | 17101 | SUZ12 polycomb repressive complex 2 subunit                                |
| SYN1      | 11494 | synapsin I                                                                 |
| TBCK      | 28261 | TBC1 domain containing kinase                                              |
| TBX1      | 11592 | T-box 1                                                                    |
| TBX15     | 11594 | T-box 15                                                                   |
| TBX3      | 11602 | T-box 3                                                                    |
| TBX6      | 11605 | T-box 6                                                                    |
| TCF12     | 11623 | transcription factor 12                                                    |
| TCIRG1    | 11647 | T cell immune regulator 1 ATPase H <sup>+</sup> transporting V0 subunit a3 |
| TCTEX1D2  | 28482 | Tctex1 domain containing 2                                                 |
| TCTN1     | 26113 | tectonic family member 1                                                   |
| TCTN2     | 25774 | tectonic family member 2                                                   |
| TCTN3     | 24519 | tectonic family member 3                                                   |
| TFAP2A    | 11742 | transcription factor AP-2 alpha                                            |
| TFAP2B    | 11743 | transcription factor AP-2 beta                                             |
| TGFBR1    | 11772 | transforming growth factor beta receptor 1                                 |
| TGFBR2    | 11773 | transforming growth factor beta receptor 2                                 |
| THRA      | 11796 | thyroid hormone receptor alpha                                             |
| TIMMDC1   | 1321  | translocase of inner mitochondrial membrane domain containing 1            |
| TMCO1     | 18188 | transmembrane and coiled-coil domains 1                                    |
| TMEM107   | 28128 | transmembrane protein 107                                                  |
| TMEM126B  | 30883 | transmembrane protein 126B                                                 |
| TMEM138   | 26944 | transmembrane protein 138                                                  |
| TMEM216   | 25018 | transmembrane protein 216                                                  |
| TMEM231   | 37234 | transmembrane protein 231                                                  |
| TMEM237   | 14432 | transmembrane protein 237                                                  |
| TMEM67    | 28396 | transmembrane protein 67                                                   |
| TNFRSF11A | 11908 | TNF receptor superfamily member 11a                                        |
| TNFRSF11B | 11909 | TNF receptor superfamily member 11b                                        |
| TNFSF11   | 11926 | TNF superfamily member 11                                                  |
| TP53      | 11998 | tumor protein p53                                                          |
| TRAF3IP1  | 17861 | TRAF3 interacting protein 1                                                |
| TRIM32    | 16380 | tripartite motif containing 32                                             |
| TRIM37    | 7523  | tripartite motif containing 37                                             |
| TRIP11    | 12305 | thyroid hormone receptor interactor 11                                     |
| TRIP13    | 12307 | thyroid hormone receptor interactor 13                                     |
| TTC21B    | 25660 | tetratricopeptide repeat domain 21B                                        |
| TTC8      | 20087 | tetratricopeptide repeat domain 8                                          |
| TWIST1    | 12428 | twist family bHLH transcription factor 1                                   |
| UBE2A     | 12472 | ubiquitin conjugating enzyme E2 A                                          |
| UBE3A     | 12496 | ubiquitin protein ligase E3A                                               |
| UFD1      | 12520 | ubiquitin recognition factor in ER associated degradation 1                |
| UPF3B     | 20439 | UPF3B regulator of nonsense mediated mRNA decay                            |
| UQCC2     | 21237 | ubiquinol-cytochrome c reductase complex assembly factor 2                 |
| USP9X     | 12632 | ubiquitin specific peptidase 9 X-linked                                    |
| VAMP7     | 11486 | vesicle associated membrane protein 7                                      |
| WASHC5    | 28984 | WASH complex subunit 5                                                     |
| WDPCP     | 28027 | WD repeat containing planar cell polarity effector                         |
| WDR19     | 18340 | WD repeat domain 19                                                        |

|        |       |                                          |
|--------|-------|------------------------------------------|
| WDR34  | 28296 | WD repeat domain 34                      |
| WDR35  | 29250 | WD repeat domain 35                      |
| WDR60  | 21862 | WD repeat domain 60                      |
| WNT5A  | 12784 | Wnt family member 5A                     |
| WNT7A  | 12786 | Wnt family member 7A                     |
| WT1    | 12796 | Wilms tumor 1                            |
| WWOX   | 12799 | WW domain containing oxidoreductase      |
| XYLT1  | 15516 | xylosyltransferase 1                     |
| YME1L1 | 12843 | YME1 like 1 ATPase                       |
| ZBTB20 | 13503 | zinc finger and BTB domain containing 20 |
| ZBTB24 | 21143 | zinc finger and BTB domain containing 24 |
| ZBTB42 | 32550 | zinc finger and BTB domain containing 42 |
| ZDHHC9 | 18475 | zinc finger DHHC-type containing 9       |
| ZFPM2  | 16700 | zinc finger protein FOG family member 2  |
| ZIC1   | 12872 | Zic family member 1                      |
| ZIC3   | 12874 | Zic family member 3                      |
| ZNF141 | 12926 | zinc finger protein 141                  |
| ZNF423 | 16762 | zinc finger protein 423                  |
| ZNF469 | 23216 | zinc finger protein 469                  |
| ZSWIM6 | 29316 | zinc finger SWIM-type containing 6       |

### Supplementary Table 2; Sequence variants correlating to patient phenotype

| HGNC symbol, sequence variant                                            |
|--------------------------------------------------------------------------|
| DICER1, NM_030621 (ENST00000393063) c.4031C>T p.Ser1344Leu, heterozygous |
| GLI2, NM_005270 (ENST00000361492) c.1760C>T p.Thr587Met, heterozygous    |
| LRP5, NM_002335 (ENST00000294304) c.3552C>T p.=, heterozygous            |
| LRP5, NM_002335 (ENST00000294304) c.4466C>T p.Thr1489Met, heterozygous   |
