# Supplementary material for: A complex DICER1 syndrome phenotype associated with a germline pathogenic variant affecting the RNase IIIa domain of DICER1
Source: PubMed Central journal article supplement (PMC8788248; doi:10.1136/jmedgenet-2020-107385), 2020-11-18
Supplement: jmedgenet-2020-107385supp002.pdf [file jmedgenet-2020-107385supp002.pdf]

**Supplementary Table 3.**  
**WT bearing RNase IIIa/IIIb hotspot mutations**

| PUBLICATION |                       |                     | WT PATIENT INFORMATION |                                     | GERMLINE/MOSAIC DICER1 VARIANT              |                            |                    |                   | WILMS TUMOR/SOMATIC DICER1 MUTATION |                                         |                        |                     | NUMBER OF DICER1 MUTATIONS  |               |
|-------------|-----------------------|---------------------|------------------------|-------------------------------------|---------------------------------------------|----------------------------|--------------------|-------------------|-------------------------------------|-----------------------------------------|------------------------|---------------------|-----------------------------|---------------|
| Reference   | PMID                  | Year                | Case ID, age, sex      | Phenotype                           | Exon                                        | DNA change                 | Protein change     | Domain            | Exon                                | DNA change                              | Protein change         | Domain              |                             |               |
| 1           | Pontén <i>et al.</i>  | this case           | 2020                   | Swedish patient; 15 months, male    | WT, WFDLA, Type I PPB, CN, ID, Macrocephaly | 21                         | c.4031C>T          | p.S1344L          | RNase IIIa                          | 0.61 Mb deletion spanning <i>DICER1</i> |                        |                     | Two mutations               |               |
| 2           | Carlens <i>et al.</i> | conference pamphlet | 2018                   | German patient; 11 months, female   | WT, ID, LC bilateral, Macrocephaly          | 21                         | c.4031C>T          | p.S1344L          | RNase IIIa                          | Not analyzed                            |                        |                     | Tumor status unknown        |               |
| 3           | Foulkes <i>et al.</i> | 24676357            | 2011                   | Fam4:III-2; 4 years, male           | WT                                          | 8                          | c.912_919dup       | p.R307Qfs*8       | TRBPBD                              | 21                                      | c.4031C>T              | p.S1344L            | RNase IIIa                  | Two mutations |
| 4           | Gadd <i>et al.</i>    | 28825729            | 2017                   | PAJNPI; 2,6 years, male             | WT                                          |                            |                    |                   |                                     | 21 + 17                                 | c.4031C>T + c.2771T>G  | p.S1344L + p.L924*  | RNase IIIa                  | Two mutations |
| 5           | Klein <i>et al.</i>   | 24676357            | 2014                   | Case 1; 9 months, male              | WT, LC bilateral, DD, OGS (GLOW syndrome)   | 24                         | c.5138A>T (mosaic) | p.D1713V (mosaic) | RNase IIIb                          | 8 + 27                                  | c.1304C>A + c.5692A>G  | p.P453H + p.R1898G  | Helicase C-Terminal + dsRBD | Two mutations |
| 6           | Klein <i>et al.</i>   | 24676357            | 2014                   | Case 2; 18 months, male             | WT, LC bilateral, DD, OGS (GLOW syndrome)   | 24                         | c.5125G>T (mosaic) | p.D1709Y (mosaic) | RNase IIIb                          | No other mutation                       |                        |                     | Monoallelic                 |               |
| 7           | Foulkes <i>et al.</i> | 24676357            | 2011                   | Fam5:II-1; 2 years, male            | WT                                          | 8                          | c.1306dup          | p.S436Ffs*41      | btwn TRBPBD and HELICc              | 25                                      | c.5138A>C              | p.D1713A            | RNase IIIb                  | Two mutations |
| 8           | Foulkes <i>et al.</i> | 24676357            | 2011                   | Fam3:IV-3; 5 years                  | WT, MNG                                     | intron 13/junction exon 14 | c.2117-1G>A        | p.G706Afs*8       | DUF                                 | 24                                      | c.5429A>G              | p.D1810G            | RNase IIIb                  | Two mutations |
| 9           | Rakheja <i>et al.</i> | 25190313            | 2014                   | CMCW11; 5,2 years, female           | WT, ASK, Thyroid-FA, ERMS, SLCT bilateral   | 21                         | c.3307_3311del     | p.I1102fsdel      | btwn PAZ and RNase IIIa             | 25                                      | c.5425G>A              | p.G1809R            | RNase IIIb                  | Two mutations |
| 10          | Wu <i>et al.</i>      | 23620094            | 2013                   | Case N                              | WT                                          |                            |                    |                   |                                     | 25                                      | c.5438A>G + c.5452G>A  | p.E1813G + p.A1818T | exon 25 skip + RNase IIIb   | Two mutations |
| 11          | Gadd <i>et al.</i>    | 28825729            | 2017                   | PAJNRH; 3,7 years + 4 years, female | WT bilateral?                               |                            |                    |                   |                                     | 27 + 24                                 | c.5622C>G + c.5125G>A  | p.Y1874* + p.D1709N | dsRBD + RNase IIIb          | Two mutations |
| 12          | Gadd <i>et al.</i>    | 28825729            | 2017                   | PAJLVL; 5,4 years, female           | WT                                          |                            |                    |                   |                                     | 24 + 6                                  | c.5138A>T + c.734+1T>C | p.D1713V + NMD      | RNase IIIb                  | Two mutations |
| 13          | Gadd <i>et al.</i>    | 28825729            | 2017                   | PAKJIF; 3,2 years, female           | WT                                          |                            |                    |                   |                                     | 19 + 24                                 | c.3008G>A + c.5125G>A  | p.R1003Q + p.D1709N | PAZ + RNase IIIb            | Two mutations |
| 14          | Walz <i>et al.</i>    | 25670082            | 2015                   | ValidationSetFHWT5                  | WT                                          |                            |                    |                   |                                     | 24                                      | c.5125G>               | p.D1709N            | RNase IIIb                  | Monoallelic   |
| 15          | Walz <i>et al.</i>    | 25670082            | 2015                   | ValidationSetFHWT6                  | WT                                          |                            |                    |                   |                                     | 24                                      | c.5125G>               | p.D1709N            | RNase IIIb                  | Monoallelic   |
| 16          | Gadd <i>et al.</i>    | 28825729            | 2017                   | PAJLXH; 8,3 years, female           | WT                                          |                            |                    |                   |                                     | 24                                      | c.5125G>A              | p.D1709N            | RNase IIIb                  | Monoallelic   |
| 17          | Gadd <i>et al.</i>    | 28825729            | 2017                   | PAJMWN; 2,1 years, female           | WT                                          |                            |                    |                   |                                     | 25                                      | c.5125G>A              | p.D1709N            | RNase IIIb                  | Monoallelic   |
| 18          | Walz <i>et al.</i>    | 25670082            | 2015                   | ValidationSetFHWT3                  | WT                                          |                            |                    |                   |                                     | 24                                      | c.5113G>               | p.E1705K            | RNase IIIb                  | Monoallelic   |
| 19          | Walz <i>et al.</i>    | 25670082            | 2015                   | ValidationSetFHWT4                  | WT                                          |                            |                    |                   |                                     | 24                                      | c.5113G>               | p.E1705K            | RNase IIIb                  | Monoallelic   |

|    |                        |          |      |                           |    |    |           |          |            |             |
|----|------------------------|----------|------|---------------------------|----|----|-----------|----------|------------|-------------|
| 20 | Gadd <i>et al.</i>     | 28825729 | 2017 | PAJNBW; 2,6 years, female | WT | 24 | c.5113G>A | p.E1705K | RNase IIIb | Monoallelic |
| 21 | Gadd <i>et al.</i>     | 28825729 | 2017 | PAJPAH; 3 years, female   | WT | 24 | c.5113G>A | p.E1705K | RNase IIIb | Monoallelic |
| 22 | Gadd <i>et al.</i>     | 28825729 | 2017 | PALEZT; 12 years, female  | WT | 24 | c.5113G>A | p.E1705K | RNase IIIb | Monoallelic |
| 23 | Gadd <i>et al.</i>     | 28825729 | 2017 | PAJLML; 3,9 years, male   | WT | 25 | c.5428G>A | p.D1810N | RNase IIIb | Monoallelic |
| 24 | Gadd <i>et al.</i>     | 28825729 | 2017 | PAJMVJ; 2,7 years, male   | WT | 25 | c.5428G>A | p.D1810N | RNase IIIb | Monoallelic |
| 25 | Torrezan <i>et al.</i> | 24909261 | 2014 | ACC13                     | WT | 25 | c.5428G>A | p.D1810N | RNase IIIb | Monoallelic |
| 26 | Walz <i>et al.</i>     | 25670082 | 2015 | ValidationSetFHWT8        | WT | 25 | c.5428G>  | p.D1810N | RNase IIIb | Monoallelic |
| 27 | Walz <i>et al.</i>     | 25670082 | 2015 | ValidationSetFHWT9        | WT | 25 | c.5428G>  | p.D1810N | RNase IIIb | Monoallelic |
| 28 | Walz <i>et al.</i>     | 25670082 | 2015 | ValidationSetFHWT7        | WT | 25 | c.5138A>  | p.D1713V | RNase IIIb | Monoallelic |
| 29 | Rakheja <i>et al.</i>  | 25190313 | 2014 | CMCW59; 3,5 years, male   | WT | 25 | c.5426G>T | p.G1809V | RNase IIIb | Monoallelic |

**Abbreviations:** ASK, anaplastic sarcoma of the kidney; CN, cystic nephroma; DD, developmental delay; ERMS, embryonal rhabdomyosarcoma; ID, intellectual disability; MNG, multinodular goitre; PPB, pleuropulmonary blastoma; OGS, overgrowth syndrome; LC, lung cysts; SLCT, Sertoli-Leydig cell tumor; Thyroid-FA, thyroid follicular adenoma; WT, Wilms tumor; WDFLA, well differentiated fetal lung carcinoma dsRBD, double stranded RNA binding domain; DUF, domain of unknown function, TRBPBD, TAR RNA binding protein binding domain.

| Number of Cases | Description                                                                   |
|-----------------|-------------------------------------------------------------------------------|
| 4               | p.S1344L                                                                      |
| 29              | WT bearing a <i>DICER1</i> RNase IIIa/IIIb hotspot mutation*                  |
| 11              | WT bearing two <i>DICER1</i> alterations                                      |
| 17              | WT bearing a single <i>DICER1</i> RNase IIIa/IIIb hotspot alteration          |
| 1               | WT bearing germline <i>DICER1</i> RNase IIIa mutation; tumor status not known |

\*p.E1705, p.D1709, p.G1809, p.D1810, p.E1813, p.D1713, p.S1344L
